# Supplementary material
Source: bioRxiv or medRxiv preprint supplement (https://www.medrxiv.org/highwire/filestream/84111/field_highwire_adjunct_files/0/2020.05.29.20116905-1.pdf)
Supplement: Supplementary file [file 2020.05.29.20116905-1.pdf]

## The *All of Us* Research Program: data quality, utility, and diversity

Andrea H. Ramirez<sup>\*1,2</sup>, Lina Sulieman<sup>2</sup>, David J. Schlueter<sup>2</sup>, Alese Halvorson<sup>2</sup>, Jun Qian<sup>2</sup>, Francis Ratsimbazafy<sup>3</sup>, Roxana Loperena<sup>3</sup>, Kelsey Mayo<sup>3</sup>, Melissa Basford<sup>3</sup>, Nicole Deflaux<sup>4</sup>, Karthik N. Muthuraman<sup>4</sup>, Karthik Natarajan<sup>5</sup>, Abel Kho<sup>6</sup>, Hua Xu<sup>7</sup>, Consuelo Wilkins<sup>1</sup>, Hoda Anton-Culver<sup>8</sup>, Eric Boerwinkle<sup>9</sup>, Mine Cicek<sup>10</sup>, Cheryl R. Clark<sup>11</sup>, Elizabeth Cohn<sup>12</sup>, Lucila Ohno-Machado<sup>13</sup>, Sheri Schully<sup>14</sup>, Brian K. Ahmedani<sup>15</sup>, Maria Argos<sup>16</sup>, Robert M. Cronin<sup>2</sup>, Christopher O'Donnell<sup>17</sup>, Mona Fouad<sup>18</sup>, David B. Goldstein<sup>19</sup>, Philip Greenland<sup>20</sup>, Scott J. Hebring<sup>21</sup>, Elizabeth W. Karlson<sup>11</sup>, Parinda Khatri<sup>22</sup>, Bruce Korf<sup>23</sup>, Jordan W. Smoller<sup>24</sup>, Stephen Sodeke<sup>25</sup>, John Wilbanks<sup>26</sup>, Justin Hentges<sup>14</sup>, Christopher Lunt<sup>14</sup>, Stephanie A. Devaney<sup>14</sup>, Kelly Gebo<sup>14</sup>, Joshua C Denny<sup>14</sup>, Robert J. Carroll<sup>2</sup>, David Glazer<sup>4</sup>, Paul A. Harris<sup>2</sup>, George Hripcsak<sup>5</sup>, Anthony Philippakis<sup>27</sup>, Dan M. Roden<sup>1,2,28</sup>, and On behalf of

the *All of Us* Research Program

<sup>1</sup>Departments of Medicine, Vanderbilt University Medical Center; <sup>2</sup> Department of Biomedical Informatics, Vanderbilt University Medical Center; <sup>3</sup>Vanderbilt Institute for Clinical and Translational Research, Vanderbilt University Medical Center; <sup>4</sup>Verily Life Sciences; <sup>5</sup>Department of Biomedical Informatics, Columbia University Medical Center; <sup>6</sup>Center for Health Information Partnerships, Northwestern University; <sup>7</sup>School of Biomedical Informatics, The University of Texas Health Science Center at Houston; <sup>8</sup>Department of Medicine, University of California Irvine; <sup>9</sup>School of Public Health, The University of Texas Health Science Center at Houston; <sup>10</sup>Department of Laboratory Medicine and Pathology, Mayo Clinic; <sup>11</sup>Department of Medicine, Brigham and Women's Hospital; <sup>12</sup>Hunter-Bellevue School of Nursing, Hunter College City University of New York; <sup>13</sup>Department of Biomedical Informatics, UCSD Health; <sup>14</sup>All of Us Research Program, National Institutes of Health; <sup>15</sup>Center for Health Policy & Health Services Research, Henry Ford Health System; <sup>16</sup>School of Public Health, University of Illinois at Chicago; <sup>17</sup>Cardiology Section, Department of Medicine, Veterans Administration Boston Healthcare System and Harvard Medical School; <sup>18</sup>Division of Preventive Medicine, University of Alabama at Birmingham; <sup>19</sup>Institute of Genomic Medicine, Columbia University Medical Center; <sup>20</sup>Department of Preventive Medicine, Feinberg School of Medicine, Northwestern University; <sup>21</sup>Center for Precision Medicine, Marshfield Clinic; <sup>22</sup>Cherokee Health Systems; <sup>23</sup>Department of Genetics, University of Alabama at Birmingham; <sup>24</sup>Department of Psychiatry and Center for Genomic Medicine, Massachusetts General Hospital; <sup>25</sup>Center for Biomedical Research, Tuskegee University; <sup>26</sup>Sage Bionetworks; <sup>27</sup>Broad Institute; Department of Pharmacology, Vanderbilt University Medical Center

### **\*Address for correspondence:**

Andrea\* H. Ramirez, MD, MS

1215 21st Avenue South

Medical Center East, South Tower

Room / Suite 8210

Nashville, TN 37232-8148

# Supplemental Figure 1. Participant counts by data type.

A

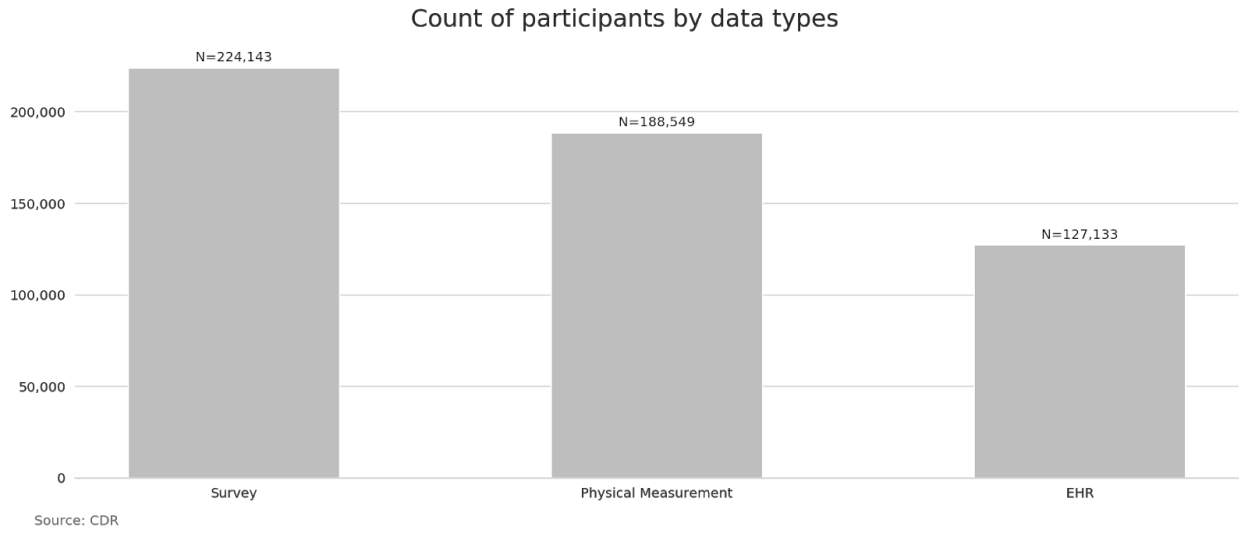

B

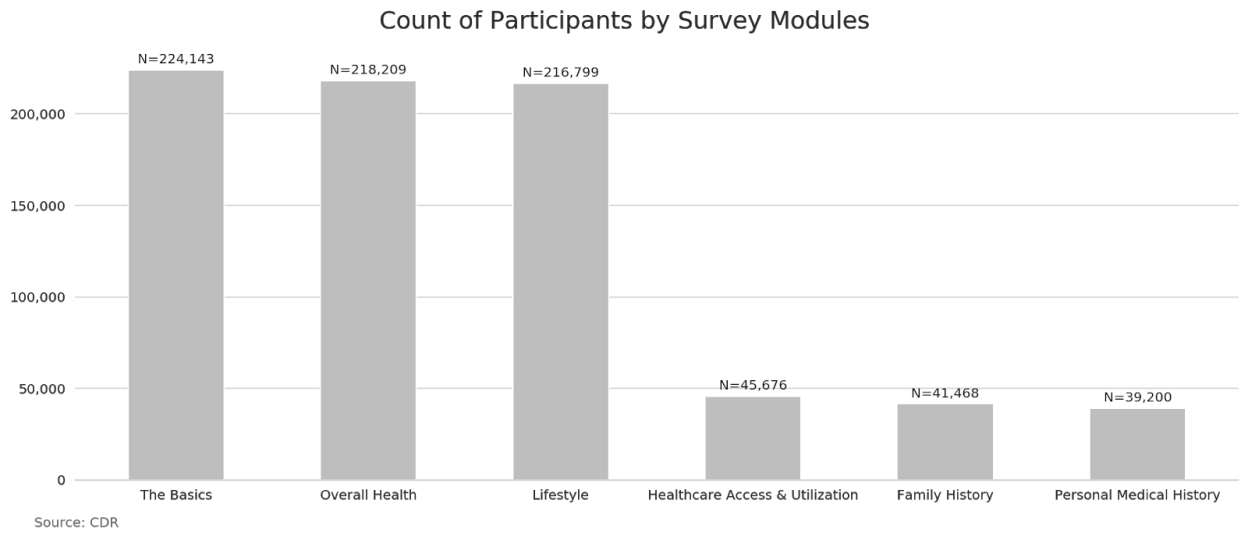

C

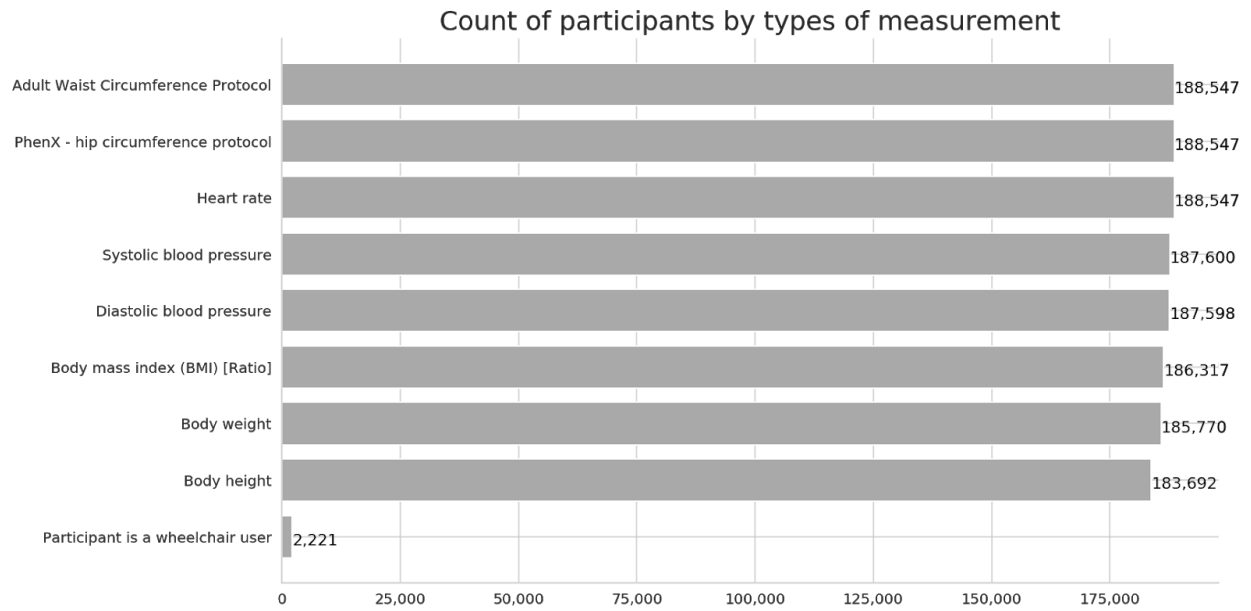

D

Count of participants with EHR data by domain

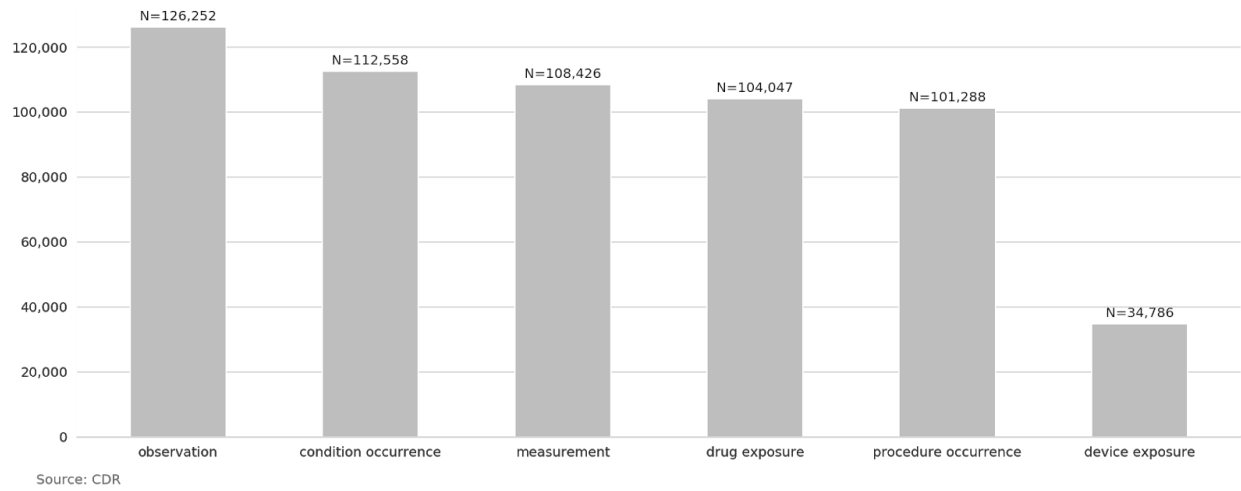

E

Row counts by data source and by domain table

\*Survey questions and answers are in Observation  
 \*Physical Measurements are in Measurement and Visit Occurrence

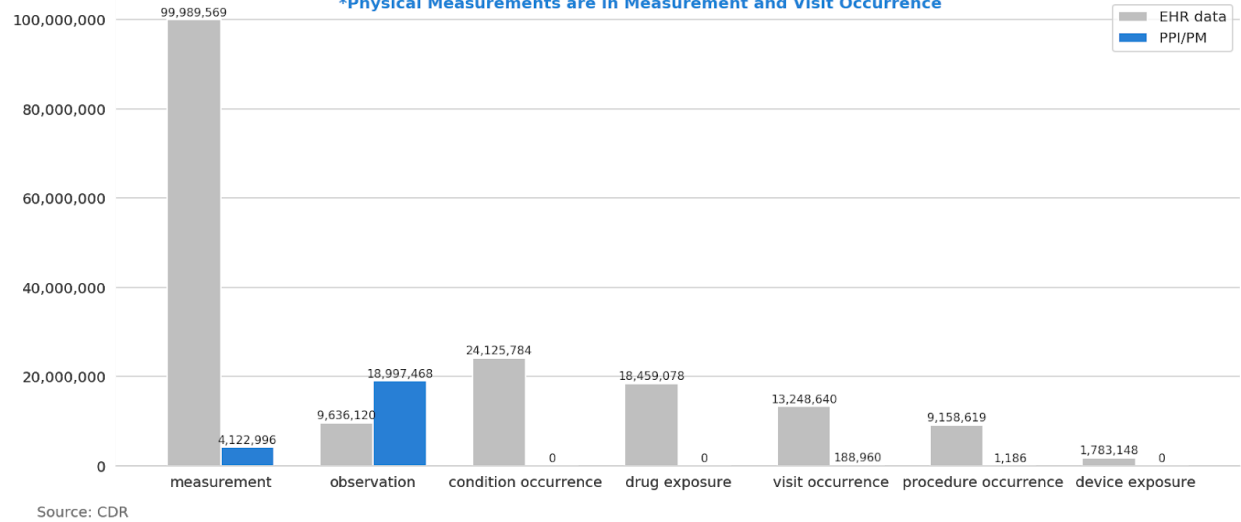

F

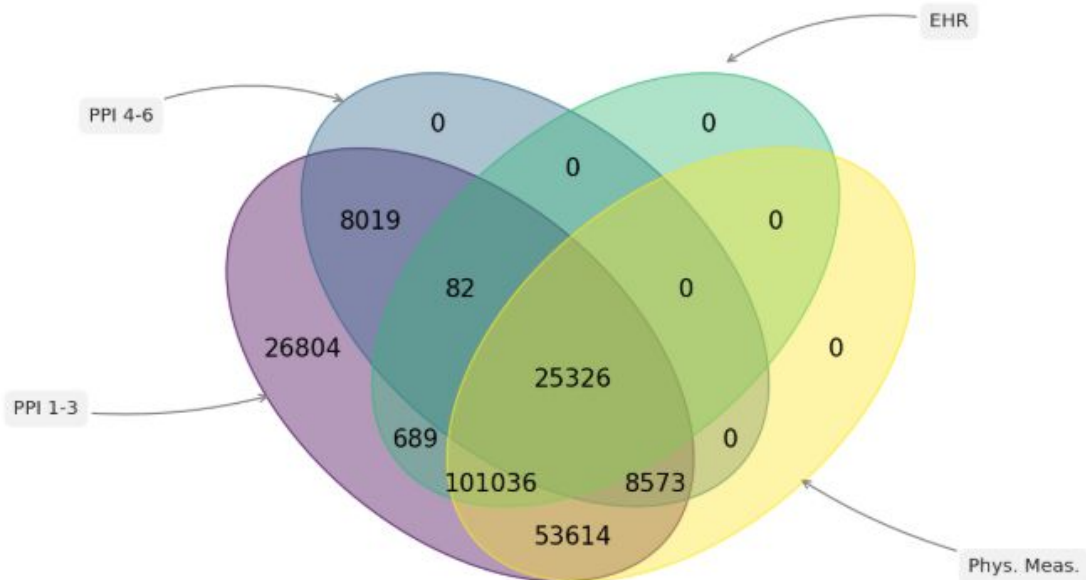

**Supplemental Figure 1: Participant counts by data type.** A: Participant count by data type including EHR, PPI surveys, and physical measurements. B: Participant count grouped by PPI survey module including “The Basics”, “Lifestyle”, “Overall Health”, “Personal Medical History”, “Health Care Access and Utilization”, and “Family Medical History”. C: Participant count by different physical measurements including waist circumference, hip circumference, heart rate, systolic and diastolic blood pressures, body mass index, body weight, body height, and wheelchair use. D: Counts of participants with EHR data by domain including observation, condition occurrence, measurement, drug exposure, procedure occurrence and device exposure. E: Row counts by data source and domain table grouped by EHR data (gray) and PPI and PM (blue). F: Venn diagram showing overlap of participants with data from EHR, PPI Surveys Part 1 (“The Basics”, “Lifestyle”, “Overall Health”), PPI Surveys Part 2 (“Personal Medical History”, “Health Care Access and Utilization”), and Program Physical Measurement data. By definition to be a participant included in the beta release, you must have answered PPI 1, therefore the zeros shown represent confirmation of this rule.

### Supplemental Table 1. Codes used in ASCVD risk score calculation.

ischemic\_heart\_codes=['I20','I21','I22','I23','I24','I25','410','411','412','413','414']

stroke\_codes=["430","431","432","434","434","435","I63.0","I63.1","I63.2","I63.3",

"I63.4","I63.5","I63.6","I63.8","I63.9","G45.9","I69.33","I69.34","I69.35"]

Diabetes ancestor codes: Type 2 diabetes mellitus 201826

Hypertension disease ancestor code: Hypertensive disorder 316866

HTN med treatment: Antihypertensive, Diuretics, Peripheral vasodilators, beta-blocking agents, calcium channel blockers, agents acting on the renin-angiotensin

21600381,21601461,21601560,21601664,21601744,21601782

### Supplemental Table 2. Individual Site EHR Medication Sequencing participants.

| EHR site*    | Number of participants with anti-diabetes sequences | Number of participants with antidepressant sequences |
|--------------|-----------------------------------------------------|------------------------------------------------------|
| EHR site 111 | 74                                                  | 61                                                   |
| EHR site 146 | 110                                                 | 422                                                  |
| EHR site 199 | 545                                                 | 580                                                  |
| EHR site 211 | 50                                                  | 120                                                  |
| EHR site 234 | 200                                                 | 411                                                  |
| EHR site 298 | 222                                                 | 211                                                  |
| EHR site 323 | 35                                                  | <20                                                  |

|              |     |      |
|--------------|-----|------|
| EHR site 352 | 354 | 245  |
| EHR site 387 | 180 | 307  |
| EHR site 394 | 110 | 371  |
| EHR site 395 | 20  | 28   |
| EHR site 473 | 206 | 467  |
| EHR site 499 | 539 | 1028 |
| EHR site 601 | 244 | 676  |
| EHR site 609 | 35  | 62   |
| EHR site 611 | 72  | 235  |
| EHR site 638 | 103 | 48   |
| EHR site 662 | 22  | 37   |
| EHR site 671 | 96  | 152  |
| EHR site 705 | 765 | 526  |
| EHR site 712 | 726 | 670  |
| EHR site 721 | 156 | 172  |

|              |      |      |
|--------------|------|------|
| EHR site 772 | 99   | 344  |
| EHR site 788 | 160  | 86   |
| EHR site 803 | 212  | 63   |
| EHR site 824 | 2032 | 4867 |
| EHR site 842 | 31   | 86   |
| EHR site 863 | <20  | <20  |
| EHR site 868 | 179  | 250  |
| EHR site 906 | 541  | 637  |
| EHR site 916 | <20  | 53   |
| EHR site 950 | 688  | 963  |
| EHR site 974 | 623  | 1591 |

\*EHR site: individual health care EHR provider



**Supplemental Table 2. Overlap of participants in Smoking Exposure PheWAS.**

| <b>ever_smoking_ppi</b>      | <b>Ever Smoker</b> | <b>Never Smoker</b> | <b>Unknown</b> | <b>All</b> |
|------------------------------|--------------------|---------------------|----------------|------------|
| <b>ehr_smoking</b>           |                    |                     |                |            |
| <b>No Codes and No EHR</b>   | 34164              | 53833               | 9013           | 97010      |
| <b>No Codes and some EHR</b> | 29853              | 68025               | 2649           | 100527     |
| <b>One Code</b>              | 6157               | 1798                | 316            | 8271       |
| <b>Two Codes</b>             | 15675              | 2020                | 640            | 18335      |
| <b>All</b>                   | 85849              | 125676              | 12618          | 224143     |

**Supplemental Table 3. Expanded PheWAS results for Ever smoking EHR and survey data.**

The “top” phenotypes are defined as the top 10 phenome-wide significant phenotypes sorted by effect size.

## **EHR Ever Smoker Oncologic PheWAS**

Nonprotective

| <b>phecode</b> | <b>description</b>                                | <b>cases</b> | <b>control</b> | <b>p_value</b> | <b>OR</b>         |
|----------------|---------------------------------------------------|--------------|----------------|----------------|-------------------|
| 165.10         | Cancer of bronchus; lung                          | 547          | 95108          | 2.276786e-64   | 4.94 (4.11, 5.95) |
| 165.00         | Cancer within the respiratory system              | 562          | 95108          | 5.500971e-66   | 4.94 (4.12, 5.92) |
| 189.21         | Malignant neoplasm of bladder                     | 339          | 94889          | 4.220036e-13   | 2.36 (1.87, 2.98) |
| 149.00         | Cancer of larynx, pharynx, nasal cavities         | 242          | 95145          | 7.431440e-09   | 2.26 (1.71, 2.97) |
| 189.20         | Cancer of bladder                                 | 364          | 94889          | 1.486141e-12   | 2.25 (1.8, 2.82)  |
| 153.30         | Malignant neoplasm of rectum, rectosigmoid jun... | 466          | 81540          | 2.245329e-14   | 2.17 (1.78, 2.65) |
| 155.10         | Malignant neoplasm of liver, primary              | 189          | 90747          | 1.392056e-06   | 2.16 (1.58, 2.96) |
| 155.00         | Cancer of liver and intrahepatic bile duct        | 229          | 90747          | 7.841085e-07   | 2.06 (1.54, 2.74) |
| 227.10         | Benign neoplasm of adrenal gland                  | 264          | 93746          | 2.975358e-06   | 1.87 (1.44, 2.43) |
| 184.00         | Cancer of other female genital organs             | 500          | 53869          | 3.457014e-09   | 1.83 (1.5, 2.23)  |

### Protective

| <b>phecode</b> | <b>description</b>                          | <b>cases</b> | <b>control</b> | <b>p_value</b> | <b>OR</b>         |
|----------------|---------------------------------------------|--------------|----------------|----------------|-------------------|
| 217.0          | Vascular hamartomas and non-neoplastic nevi | 869          | 84356          | 1.227894e-11   | 0.51 (0.42, 0.62) |
| 217.1          | Nevus, non-neoplastic                       | 821          | 84356          | 1.175278e-10   | 0.52 (0.43, 0.64) |
| 216.0          | Benign neoplasm of skin                     | 5803         | 84356          | 6.001888e-51   | 0.53 (0.49, 0.58) |
| 228.1          | Hemangioma of skin and subcutaneous tissue  | 943          | 92037          | 9.085644e-10   | 0.57 (0.47, 0.68) |
| 228.0          | Hemangioma and lymphangioma, any site       | 1536         | 92037          | 5.674045e-07   | 0.71 (0.62, 0.81) |

### Overall

| <b>phecode</b> | <b>description</b>                                | <b>cases</b> | <b>control</b> | <b>p_value</b> | <b>OR</b>         |
|----------------|---------------------------------------------------|--------------|----------------|----------------|-------------------|
| 165.10         | Cancer of bronchus; lung                          | 547          | 95108          | 2.276786e-64   | 4.94 (4.11, 5.95) |
| 165.00         | Cancer within the respiratory system              | 562          | 95108          | 5.500971e-66   | 4.94 (4.12, 5.92) |
| 189.21         | Malignant neoplasm of bladder                     | 339          | 94889          | 4.220036e-13   | 2.36 (1.87, 2.98) |
| 149.00         | Cancer of larynx, pharynx, nasal cavities         | 242          | 95145          | 7.431440e-09   | 2.26 (1.71, 2.97) |
| 189.20         | Cancer of bladder                                 | 364          | 94889          | 1.486141e-12   | 2.25 (1.8, 2.82)  |
| 153.30         | Malignant neoplasm of rectum, rectosigmoid jun... | 466          | 81540          | 2.245329e-14   | 2.17 (1.78, 2.65) |
| 155.10         | Malignant neoplasm of liver, primary              | 189          | 90747          | 1.392056e-06   | 2.16 (1.58, 2.96) |
| 155.00         | Cancer of liver and intrahepatic bile duct        | 229          | 90747          | 7.841085e-07   | 2.06 (1.54, 2.74) |
| 217.00         | Vascular hamartomas and non-neoplastic nevi       | 869          | 84356          | 1.227894e-11   | 0.51 (0.42, 0.62) |
| 217.10         | Nevus, non-neoplastic                             | 821          | 84356          | 1.175278e-10   | 0.52 (0.43, 0.64) |

## Survey Current Smoker Oncologic PheWAS

Nonprotective

| <b>phecode</b> | <b>description</b>                   | <b>cases</b> | <b>control</b> | <b>p_value</b> | <b>OR</b>         |
|----------------|--------------------------------------|--------------|----------------|----------------|-------------------|
| 165.10         | Cancer of bronchus; lung             | 268          | 77672          | 1.968977e-19   | 3.52 (2.68, 4.62) |
| 165.00         | Cancer within the respiratory system | 275          | 77672          | 9.589970e-19   | 3.38 (2.58, 4.44) |
| 189.21         | Malignant neoplasm of bladder        | 189          | 77447          | 4.125790e-07   | 2.52 (1.76, 3.6)  |

Protective

| phecode | description                                 | cases | control | p_value      | OR                |
|---------|---------------------------------------------|-------|---------|--------------|-------------------|
| 217.10  | Nevus, non-neoplastic                       | 582   | 69636   | 6.238387e-14 | 0.24 (0.17, 0.35) |
| 217.00  | Vascular hamartomas and non-neoplastic nevi | 623   | 69636   | 1.154638e-14 | 0.25 (0.18, 0.36) |
| 228.10  | Hemangioma of skin and subcutaneous tissue  | 654   | 75337   | 3.781155e-12 | 0.26 (0.17, 0.38) |
| 216.00  | Benign neoplasm of skin                     | 4237  | 69636   | 5.821750e-87 | 0.27 (0.23, 0.3)  |
| 173.00  | Neoplasm of uncertain behavior of skin      | 1377  | 72648   | 1.109613e-24 | 0.34 (0.27, 0.42) |
| 204.40  | Multiple myeloma                            | 204   | 76060   | 2.475480e-05 | 0.35 (0.22, 0.57) |
| 172.21  | Basal cell carcinoma                        | 738   | 72648   | 1.053635e-10 | 0.36 (0.26, 0.49) |
| 204.00  | Leukemia                                    | 498   | 76060   | 8.905774e-11 | 0.36 (0.27, 0.49) |
| 228.00  | Hemangioma and lymphangioma, any site       | 1077  | 75337   | 2.464672e-16 | 0.36 (0.28, 0.46) |
| 172.10  | Melanomas of skin, dx or hx                 | 485   | 72648   | 3.876019e-08 | 0.37 (0.26, 0.53) |

## Overall

| phecode | description                                 | cases | control | p_value      | OR                |
|---------|---------------------------------------------|-------|---------|--------------|-------------------|
| 217.10  | Nevus, non-neoplastic                       | 582   | 69636   | 6.238387e-14 | 0.24 (0.17, 0.35) |
| 217.00  | Vascular hamartomas and non-neoplastic nevi | 623   | 69636   | 1.154638e-14 | 0.25 (0.18, 0.36) |
| 228.10  | Hemangioma of skin and subcutaneous tissue  | 654   | 75337   | 3.781155e-12 | 0.26 (0.17, 0.38) |
| 216.00  | Benign neoplasm of skin                     | 4237  | 69636   | 5.821750e-87 | 0.27 (0.23, 0.3)  |
| 165.10  | Cancer of bronchus; lung                    | 268   | 77672   | 1.968977e-19 | 3.52 (2.68, 4.62) |
| 165.00  | Cancer within the respiratory system        | 275   | 77672   | 9.589970e-19 | 3.38 (2.58, 4.44) |
| 173.00  | Neoplasm of uncertain behavior of skin      | 1377  | 72648   | 1.109613e-24 | 0.34 (0.27, 0.42) |
| 204.40  | Multiple myeloma                            | 204   | 76060   | 2.475480e-05 | 0.35 (0.22, 0.57) |
| 172.21  | Basal cell carcinoma                        | 738   | 72648   | 1.053635e-10 | 0.36 (0.26, 0.49) |
| 204.00  | Leukemia                                    | 498   | 76060   | 8.905774e-11 | 0.36 (0.27, 0.49) |

## Survey Ever Smoker Oncologic PheWAS

Nonprotective

| <b>phecode</b> | <b>description</b>                   | <b>cases</b> | <b>control</b> | <b>p_value</b> | <b>OR</b>         |
|----------------|--------------------------------------|--------------|----------------|----------------|-------------------|
| 165.10         | Cancer of bronchus; lung             | 592          | 100501         | 3.550585e-34   | 3.19 (2.65, 3.84) |
| 165.00         | Cancer within the respiratory system | 607          | 100501         | 1.977280e-34   | 3.15 (2.62, 3.78) |
| 180.10         | Cervical cancer                      | 247          | 50045          | 2.105232e-07   | 2.0 (1.54, 2.59)  |
| 189.21         | Malignant neoplasm of bladder        | 372          | 100275         | 2.547259e-07   | 1.76 (1.42, 2.18) |
| 189.20         | Cancer of bladder                    | 402          | 100275         | 6.152779e-07   | 1.69 (1.37, 2.08) |

## Protective

| <b>phecode</b> | <b>description</b>                          | <b>cases</b> | <b>control</b> | <b>p_value</b> | <b>OR</b>         |
|----------------|---------------------------------------------|--------------|----------------|----------------|-------------------|
| 217.0          | Vascular hamartomas and non-neoplastic nevi | 895          | 89274          | 2.323566e-15   | 0.55 (0.48, 0.64) |
| 217.1          | Nevus, non-neoplastic                       | 847          | 89274          | 6.477657e-14   | 0.57 (0.49, 0.66) |
| 216.0          | Benign neoplasm of skin                     | 6116         | 89274          | 1.483150e-51   | 0.62 (0.58, 0.66) |
| 228.1          | Hemangioma of skin and subcutaneous tissue  | 1003         | 97279          | 2.766770e-10   | 0.65 (0.57, 0.74) |
| 185.0          | Cancer of prostate                          | 1530         | 27165          | 1.380273e-09   | 0.69 (0.61, 0.78) |
| 228.0          | Hemangioma and lymphangioma, any site       | 1626         | 97279          | 1.232647e-11   | 0.69 (0.62, 0.77) |
| 196.0          | Radiotherapy                                | 4466         | 84432          | 4.800319e-23   | 0.7 (0.65, 0.75)  |
| 197.0          | Chemotherapy                                | 6114         | 84432          | 2.095024e-24   | 0.73 (0.68, 0.77) |
| 173.0          | Neoplasm of uncertain behavior of skin      | 2101         | 93050          | 4.468407e-11   | 0.73 (0.66, 0.8)  |
| 218.1          | Uterine leiomyoma                           | 3080         | 53707          | 4.420974e-12   | 0.74 (0.68, 0.81) |

## Overall

| phecode | description                                 | cases | control | p_value      | OR                |
|---------|---------------------------------------------|-------|---------|--------------|-------------------|
| 165.10  | Cancer of bronchus; lung                    | 592   | 100501  | 3.550585e-34 | 3.19 (2.65, 3.84) |
| 165.00  | Cancer within the respiratory system        | 607   | 100501  | 1.977280e-34 | 3.15 (2.62, 3.78) |
| 180.10  | Cervical cancer                             | 247   | 50045   | 2.105232e-07 | 2.0 (1.54, 2.59)  |
| 217.00  | Vascular hamartomas and non-neoplastic nevi | 895   | 89274   | 2.323566e-15 | 0.55 (0.48, 0.64) |
| 217.10  | Nevus, non-neoplastic                       | 847   | 89274   | 6.477657e-14 | 0.57 (0.49, 0.66) |
| 189.21  | Malignant neoplasm of bladder               | 372   | 100275  | 2.547259e-07 | 1.76 (1.42, 2.18) |
| 189.20  | Cancer of bladder                           | 402   | 100275  | 6.152779e-07 | 1.69 (1.37, 2.08) |
| 216.00  | Benign neoplasm of skin                     | 6116  | 89274   | 1.483150e-51 | 0.62 (0.58, 0.66) |
| 228.10  | Hemangioma of skin and subcutaneous tissue  | 1003  | 97279   | 2.766770e-10 | 0.65 (0.57, 0.74) |
| 185.00  | Cancer of prostate                          | 1530  | 27165   | 1.380273e-09 | 0.69 (0.61, 0.78) |

**Supplemental Table 4. ASCVD risk score demographic distributions**

|               | All participants<br>(n=229255) | Participants<br>with any EHR<br>(n= 118332) | ASCVD scores<br>(n=26007) | ASCVD scores<br>within a year of<br>enrollment<br>(n=6225) |
|---------------|--------------------------------|---------------------------------------------|---------------------------|------------------------------------------------------------|
| <b>Gender</b> |                                |                                             |                           |                                                            |
| Male          | 85,645<br>(37.36%)             | 42,867<br>(63.27%)                          | 8,655 (33.28%)            | 2,127 (34.17%)                                             |

|                                     |                     |                    |                 |                |
|-------------------------------------|---------------------|--------------------|-----------------|----------------|
| Female                              | 140,818<br>(61.42%) | 74,867<br>(35.52%) | 17,352 (66.72%) | 4,098 (65.83%) |
| prefer not<br>to<br>answer          | 2,789 (1.21%)       | 1,435 (1.21%)      | 0 (0%)          | 0 (0%)         |
| <b>Race</b>                         |                     |                    |                 |                |
| White                               | 120,760<br>(52.67%) | 61,348<br>(51.84%) | 15,743 (60.53%) | 3,344 (53.71%) |
| Black                               | 46,679<br>(20.36%)  | 24,450<br>(20.66%) | 5,491 (21.13%)  | 1,576 (25.31%) |
| Hispanic                            | 42,736<br>(18.64%)  | 23,355<br>(19.74%) | 3,198 (12.30%)  | 885 (14.22%)   |
| Asian                               | 7,602 (3.32%)       | 3,309 (2.80%)      | 546 (2.10%)     | 144 (2.31%)    |
| More<br>than one<br>populatio<br>n  | 4,134 (1.80%)       | 2,023 (1.70%)      | 304 (1.17%)     | 87 (1.40%)     |
| Another<br>single<br>populatio<br>n | 1,705 (0.74%)       | 894 (0.76%)        | 139 (0.53%)     | 46 (0.74%)     |
| None of<br>these                    | 2,401 (1.04%)       | 1,254 (1.06%)      | 250 (0.96%)     | 54 (0.87%)     |

|                      |               |             |             |            |
|----------------------|---------------|-------------|-------------|------------|
| Prefer not to answer | 1,654 (0.72%) | 873 (0.74%) | 155 (0.53%) | 47 (0.76%) |
| Skip                 | 1,584 (0.70%) | 826 (0.70%) | 181 (0.7%)  | 42 (0.67%) |

**Supplemental Table 5.** Approximate compute cost on Researcher Workbench for individual analyses, in dollars.

| Analysis                | Development cost | Single run cost | Total cost |
|-------------------------|------------------|-----------------|------------|
| Descriptive metrics     | 28.35            | 3.48            | 31.83      |
| Medication sequencing   | 28.15            | 6.39            | 34.54      |
| Smoking exposure PheWAS | 7.00             | 4.20            | 11.20      |
| ASCVD score calculation | 11.71            | 7.20            | 18.91      |
| Total                   | 75.21            | 21.27           | 96.48      |

\* Access to the Researcher Workbench and data are free. Compute and storage accrue usage cost. The Researcher Workbench uses Google Compute Engine (GCE) for computational resources in the cloud and Google Cloud Storage (GCS) for storage in the cloud. Jupyter Notebooks are loaded in a GCE Virtual machine, which is ephemeral. During this project, the



hourly rate of the default n1-highmem-4 machine was \$0.27 per hour, including the cost for dataproc clusters. Notebooks not in active use are “paused” accruing cost of under \$0.10 per day and shut down to zero cost after two weeks of inactivity. The storage “bucket” associated with Notebooks within a workspace costs \$0.026 per GB per month.

### **Data Availability Links: The *All of Us* Researcher Workbench**

Medication sequences for Type 2 diabetes and depression comparison by race:

<https://workbench.researchallofus.org/workspaces/aou-rw-dd7cff0e/medicationspathwaysequencesbyracephase1/notebooks>

Cardiovascular risk score:

<https://workbench.researchallofus.org/workspaces/aou-rw-a8fc912d/duplicateofframinghamahariskscore/notebooks>

PheWAS Smoking:

<https://workbench.researchallofus.org/workspaces/aou-rw-d59956e4/jamaphewasfinalreview05212020/data>
